# Supplementary material for: Genomic Characterization of H14 Subtype Influenza A Viruses in New World Waterfowl and Experimental Infectivity in Mallards (Anas platyrhynchos)
Source: PubMed Central journal article supplement (PMC4006863; doi:10.1371/journal.pone.0095620), 2014-05-01

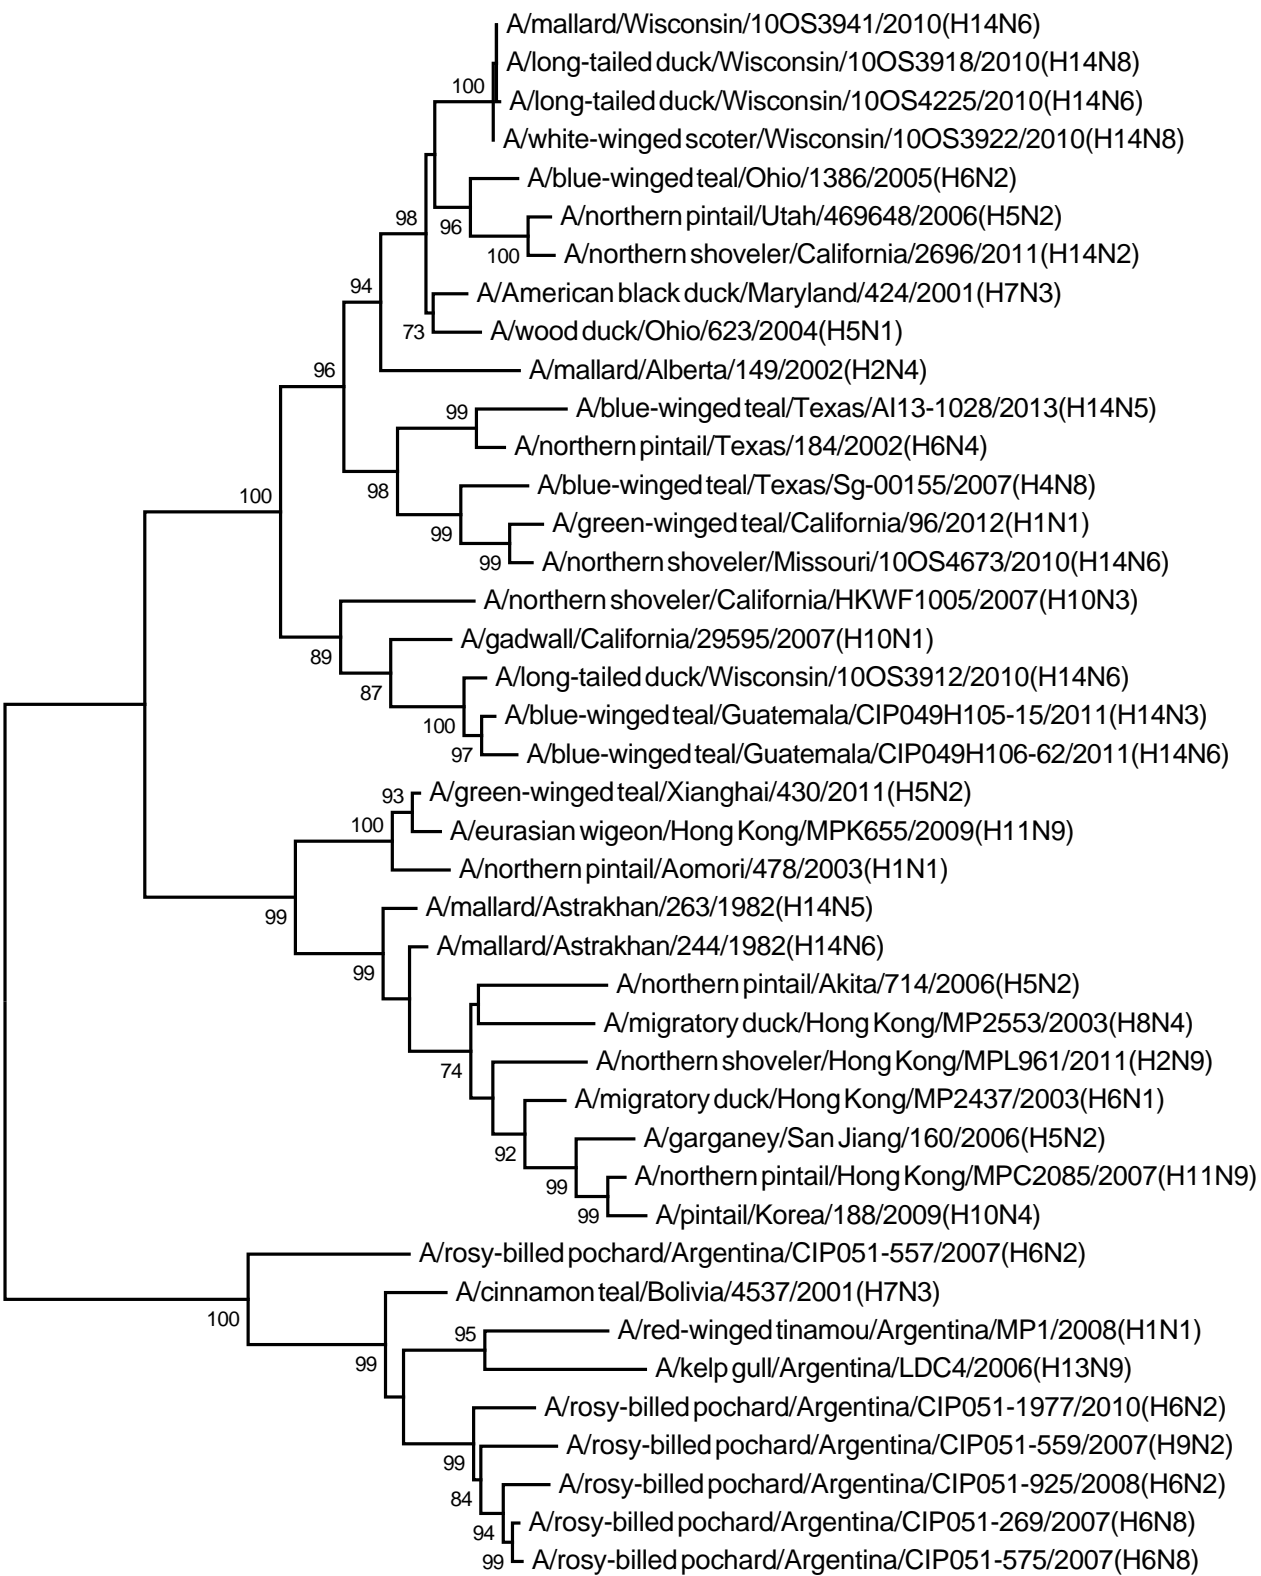

Supplement: pone.0095620.s004.pdf [file pone.0095620.s004.pdf]
