# Supplementary material for: Genomic Characterization of H14 Subtype Influenza A Viruses in New World Waterfowl and Experimental Infectivity in Mallards (Anas platyrhynchos)
Source: PubMed Central journal article supplement (PMC4006863; doi:10.1371/journal.pone.0095620), 2014-05-01
Supplement: pone.0095620.s006.pdf [file pone.0095620.s006.pdf]

A/mallard/Minnesota/AI09-2749/2009(H6N8)  
 77 A/blue-winged teal/Guatemala/CIP049H106-62/2011(H14N6)  
 A/mallard/Alberta/149/2002(H2N4)  
 A/pintail/Alberta/269/2001(H4N6)  
 89 A/green-winged teal/California/AKS1370/2008(H7N3)  
 99 A/blue-winged teal/Texas/AI13-1028/2013(H14N5)  
 A/blue-winged teal/North Dakota/AI09-3760/2009(H7N3)  
 95 A/blue-winged teal/Guatemala/CIP049H105-15/2011(H14N3)  
 A/cinnamon teal/Bolivia/4537/2001(H7N3)  
 97 A/kelp gull/Argentina/LDC4/2006(H13N9)  
 A/rosy-billed pochard/Argentina/CIP051-559/2007(H9N2)  
 A/rosy-billed pochard/Argentina/CIP051-1977/2010(H6N2)  
 99 A/rosy-billed pochard/Argentina/CIP051-925/2008(H6N2)  
 100  
 A/mallard/Astrakhan/263/1982(H14N5)  
 74 A/mallard/Astrakhan/244/1982(H14N6)  
 100 A/long-tailed duck/Wisconsin/10OS4225/2010(H14N6)  
 A/mallard/Wisconsin/10OS3941/2010(H14N6)  
 A/Baikal teal/Hongze/14/2005(H11N9)  
 81 A/pintail/Akita/1265/2008(H1N2)  
 88 A/pintail/Korea/1173/2009(H7N7)  
 A/spot-billed duck/Korea/KNUSYG06/2006(H5N3)  
 91 A/spot-billed duck/Korea/546/2008(H6N1)  
 88 A/northern shoveler/Hong Kong/MPC657/2006(H10N9)  
 A/northern pintail/Akita/714/2006(H5N2)  
 93 A/northern pintail/Hong Kong/MPJ851/2009(H11N9)  
 A/ruddy shelduck/Mongolia/1-26/2007(H3N8)  
 98 A/whooper swan/Mongolia/1-17/2007(H3N8)  
 A/rosy-billed pochard/Argentina/CIP051-575/2007(H6N8)  
 A/rosy-billed pochard/Argentina/CIP051-557/2007(H6N2)  
 99 A/rosy-billed pochard/Argentina/CIP051-269/2007(H6N8)  
 A/red-winged tinamou/Argentina/MP1/2008(H1N1)  
 74 A/northern shoveler/California/2696/2011(H14N2)  
 95 A/wood duck/Ohio/623/2004(H5N1)  
 A/northern pintail/California/466371/2006(H5N2)  
 90 A/northern pintail/Alberta/8/2009(H3N8)  
 89 A/northern shoveler/Missouri/10OS4673/2010(H14N6)  
 A/northern shoveler/Arkansas/11OS386/2011(H9N2)  
 A/American black duck/Illinois/4119/2009(H8N4)  
 96 A/long-tailed duck/Wisconsin/10OS3912/2010(H14N6)  
 A/white-winged scoter/Wisconsin/10OS3922/2010(H14N8)  
 99 A/long-tailed duck/Wisconsin/10OS3918/2010(H14N8)
